# Supplementary material for: Integrated Genome-Scale Prediction of Detrimental Mutations in Transcription Networks
Source: PubMed Central journal article supplement (PMC3102745; doi:10.1371/journal.pgen.1002077), 2011-05-26

A

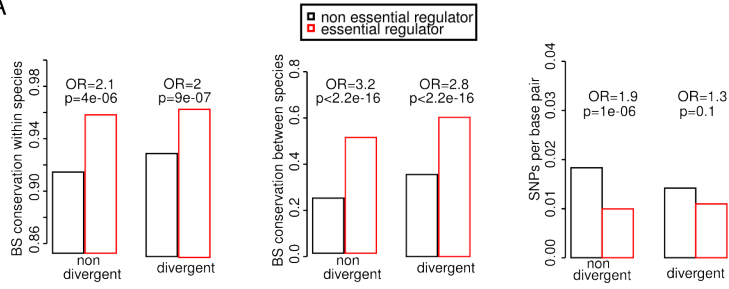

B

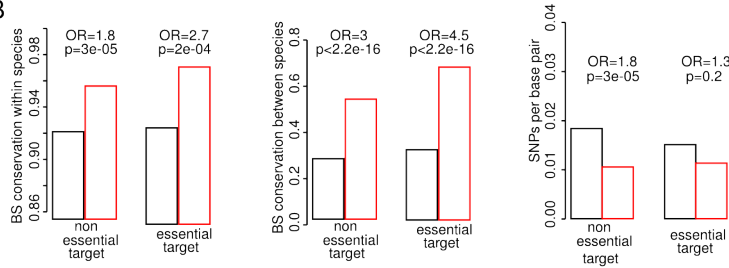

C

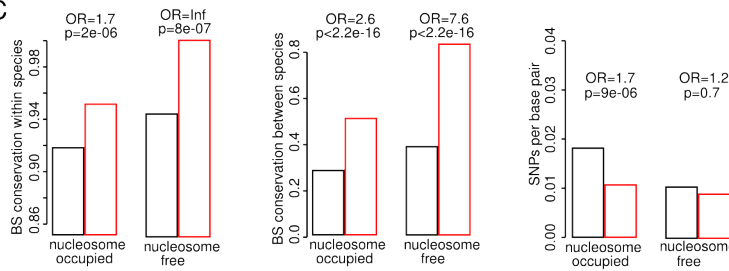

D

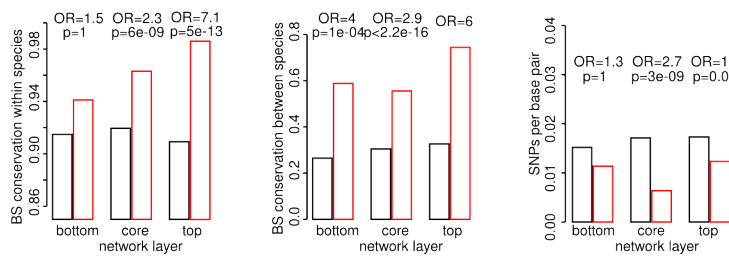

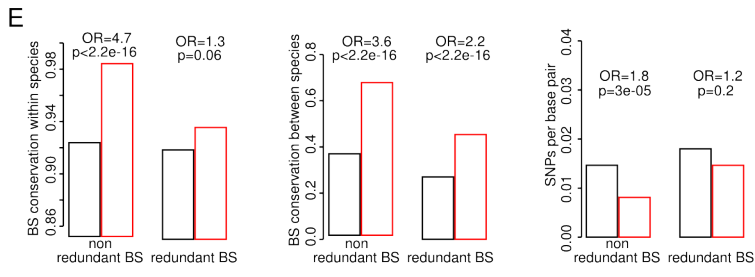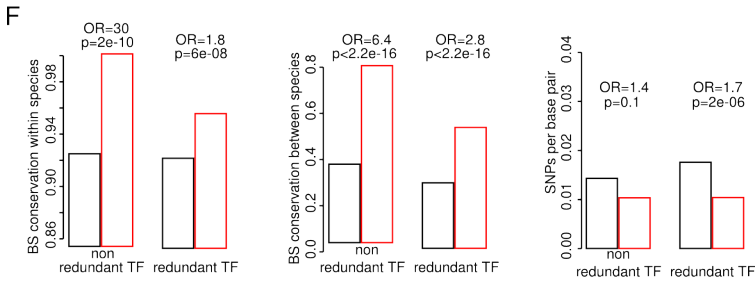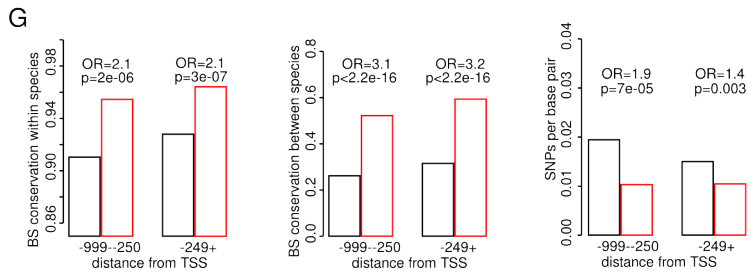

Supplement: pgen.1002077.s004.pdf [file pgen.1002077.s004.pdf]
